# Supplementary material for: Lytic Transcriptome Dataset of Varicella Zoster Virus Generated by Long-Read Sequencing
Source: Front Genet. 2018 Oct 16;9:460. doi: 10.3389/fgene.2018.00460 (PMC6198048; doi:10.3389/fgene.2018.00460)
Supplement: Supplementary Table 1 — Basic statistics of the reads. Anumber of reads in the given file; Bmean of the read lengths in given FASTQ; Cstandard deviation; DPhred scale used (Phred scale also known as the quality or Q scores of a base, which are often represented as ASCII characters. Tables converting between integer Q scores, ASCII characters and error probabilities are shown in the upper table in the following website: https://www.drive5.com/usearch/manual/quality_score.html. The ASCII_BASE 33 is now almost universally used for short – and long-read sequencing techniques); ENumber of reads used to generate duplicate read statistics (the total read count of a given sample was used for the duplicate analysis); Fbase Quality min; Gbase Quality max; Hbase Quality mean; Ibase Quality SD; J A content (%); KC content (%); LG content (%); MT content (%); Ntotal number of bases; (Unique: duplicates have been removed; Duplicates: duplicate reads are included in the statistics). [file Table_1.XLSX]

## Sheet: Munka1
Passed	1D seq	CAP seq		Failed	1D seq	CAP seq
ReadsA	57888	509531		ReadsA	930	8602
MeanB	1470.14	426.92		MeanB	435.9441	404.56
SDC	990.48	200.8		SDC	773.8464	217.32
PhredD	33	33		PhredD	33	33
NoE	57888	509531		NoE	930	8602
QminF	1	1		QminF	1	1
QmaxG	28	28		QmaxG	26	27
QmeanH	13.39	11.41		QmeanH	4.2906	7.3258
QSDI	6.8	6.18		QSDI	2.8513	4.6635
AJ	17.45	17.64		AJ	16.6326	18.3914
CK	21.04	17.18		CK	30.5805	20.1810
GL	24.05	21.77		GL	16.8107	23.9479
TM	37.46	43.41		TM	35.9763	37.4797
Base noN	85100000	218000000		Base noN	405428	3480081
